# Supplementary material for: Resuscitators' opinions on using a respiratory function monitor during neonatal resuscitation
Source: PubMed Central journal article supplement — Acta Paediatr. 2022 Oct 8;112(1):63–8. doi: 10.1111/apa.16559 (PMC10092741; doi:10.1111/apa.16559), 2022-10-08
Supplement: APA-112-63-s002.pdf [file APA-112-63-s002.pdf]

## Survey MONitor trial

This is an anonymous questionnaire which consist out of 13 questions. The results will only be used for research purposes.

### 1. I'm a

- Resident       Physician assistant       Neonatology fellow       Neonatologist

### Location:

- LUMC
- Department of Newborn Research of the Royal Women's Hospital in Melbourne-Australia
- Maternal & Children's University Hospital La Fe in Valencia-Spain
- Neonatal Intensive Care Unit of V. Buzzi Children's Hospital in Milan-Italy
- Universitatmedizin Gottingen in Gottingen-Germany
- Universitatsklinikum Koln in Koln-Germany
- Children's Hospital Philadelphia in Pennsylvania-United States
- Other: .....

### 2. What do you expect to be the main conclusion from the MONITOR trial:

- More adequate ventilation is given when the RFM is visible compared to blinded.
- There is no difference in ventilation when the RFM is visible compared to blinded.
- Less adequate ventilation is given when the RFM is visible compared to blinded.

### 3. How many delivery room resuscitations in which a RFM (respiratory function monitor) is used, are you actively involved in per year?

- <10       10-20       20-30       >30

**4. Do you look at the RFM during delivery room resuscitations?**

- Yes       No       Unsure

If yes, where do you look at when using **the RFM**?

**1. Pressure**

- Numbers       Yes       No       Unsure  
 Pressure curve       Yes       No       Unsure

**2. Tidal volumes**

- Numbers       Yes       No       Unsure  
 Graph       Yes       No       Unsure

**3. Leak**

- Numbers       Yes       No       Unsure  
 Flow curve       Yes       No       Unsure

**4. Plethysmogram**       Yes       No       Unsure

**5. Heart rate**       Yes       No       Unsure

**6. SpO2**       Yes       No       Unsure

**7. FiO2**       Yes       No       Unsure

**8. Spontaneous breathing**

- Flow curve       Yes       No       Unsure  
 Pressure curve       Yes       No       Unsure  
 Tidal volume graph       Yes       No       Unsure

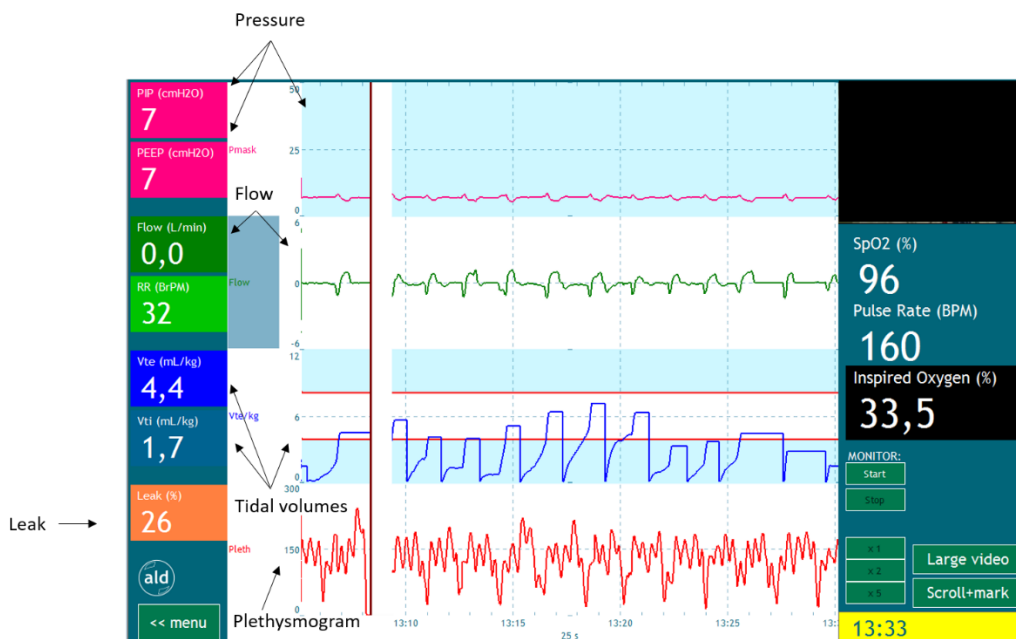

**5. Do you think the RFM influences your decisions and/or actions during the delivery room resuscitation?**

- Yes             No             Unsure

**6. Do you have the opportunity to review the resuscitations you performed?**

- Yes             No

If yes, with whom do you review the resuscitation and how often do you have this opportunity?

- Alone/with supervisor:       1x/month       1x/ 2 weeks       1x/week       Every day

- Medical team:                       1x/month       1x/ 2 weeks       1x/week       Every day

- Other: .....

**7. Do you think you are sufficiently trained in using and interpreting the RFM?**

- Yes             No             Unsure

**8. Would you like to have more training in using and interpreting the RFM?**

- Yes             No             Unsure

If yes, what would this training ideally look like and how often should it be given (be as concrete as possible)?

.....  
.....

**9. Who interpreters the RFM during a resuscitation**

- Resuscitator/ Airway provider

- Supervisor

- Both

- Other

If other, explain: .....

10. What would you do when you see the following RFM screens during the resuscitation of a preterm infant (multiple answers possible)?

A)

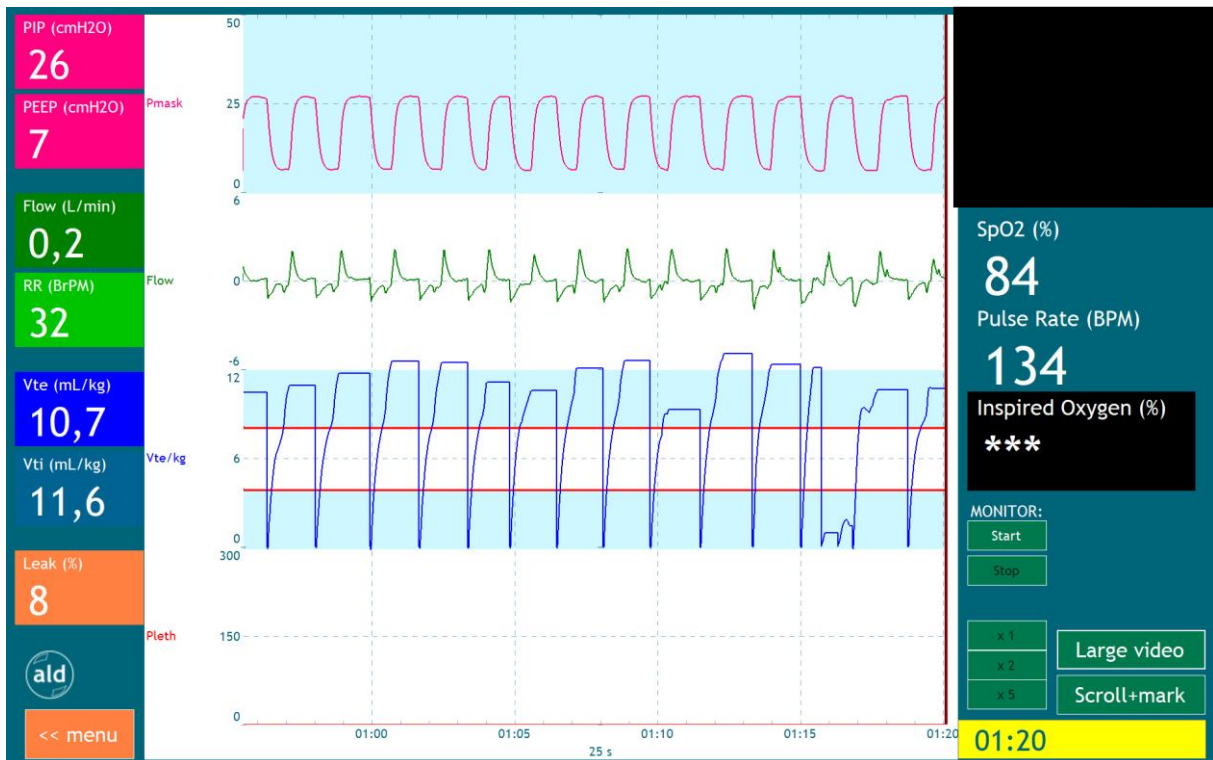

- Mask reposition/ Change mask size
- Adjust PEEP
- Adjust PIP
- Suctioning
- Stop PPV and evaluate on CPAP
- Continue resuscitation without any adjustments
- Other: .....

B)

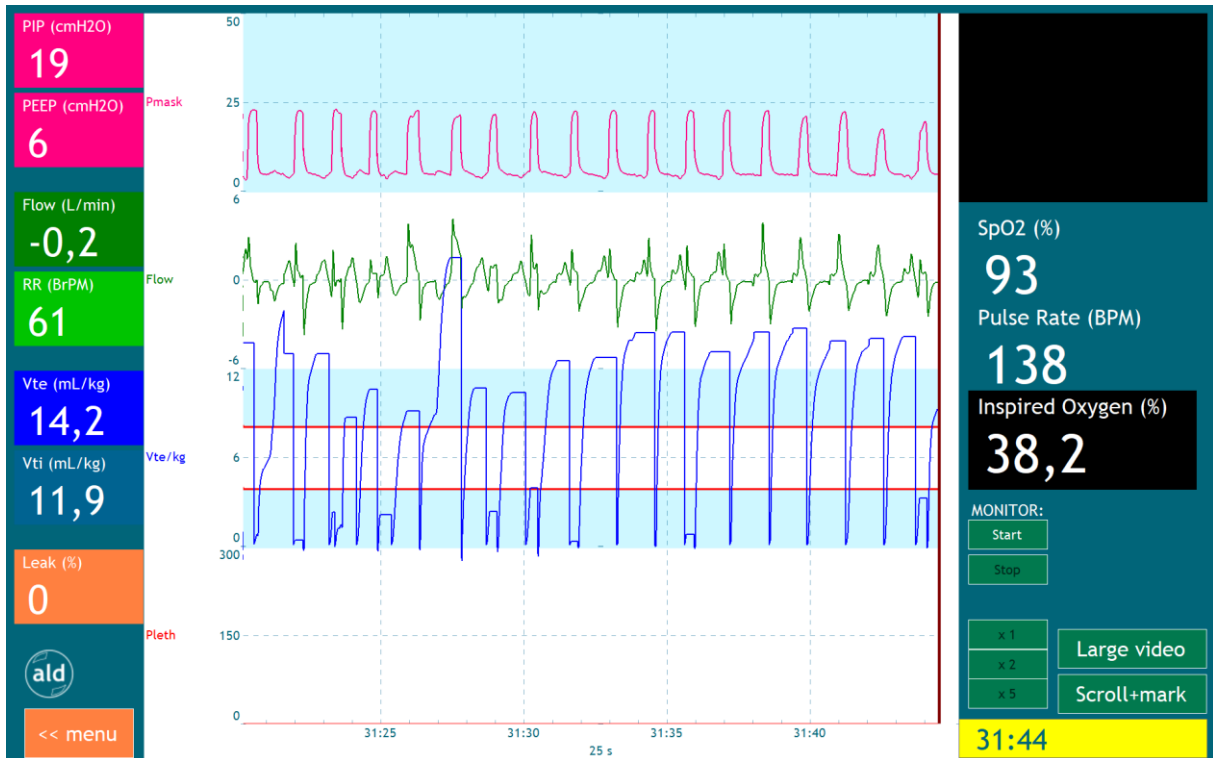

- Mask reposition/ Change mask size
  - Adjust PEEP
  - Adjust PIP
  - Suctioning
  - Stop PPV and evaluate on CPAP
  - Continue resuscitation without any adjustments
  - Other: .....
- .....

c)

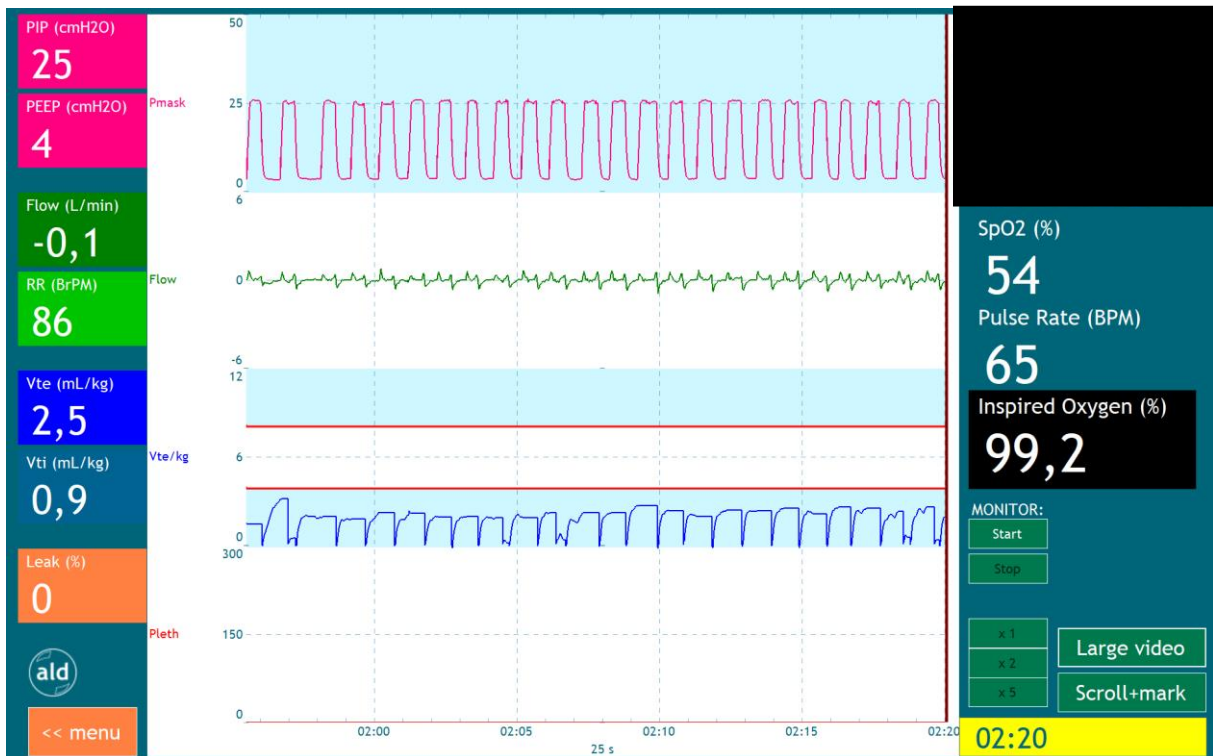

- Mask reposition/ Change mask size
- Adjust PEEP
- Adjust PIP
- Suctioning
- Stop PPV and evaluate on CPAP
- Continue resuscitation without any adjustments
- Other: .....
- .....

D)

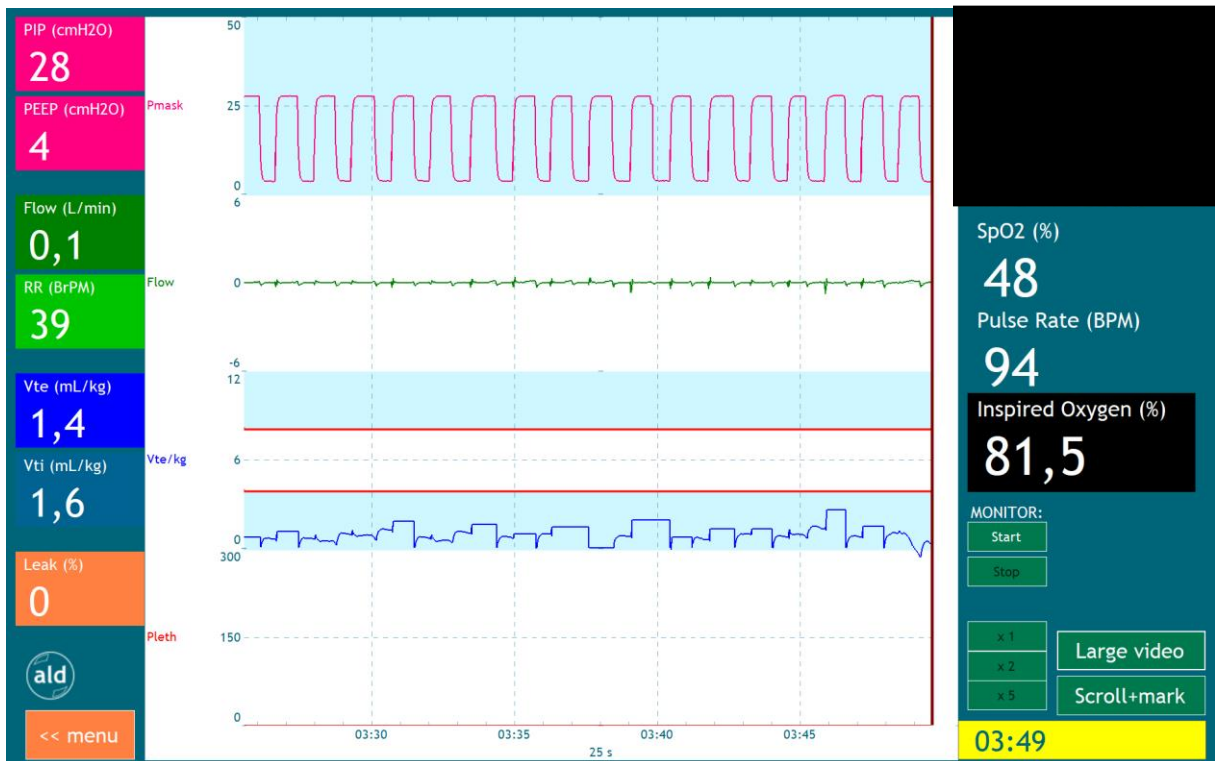

- Mask reposition/ Change mask size
  - Adjust PEEP
  - Adjust PIP
  - Suctioning
  - Stop PPV and evaluate on CPAP
  - Continue resuscitation without any adjustments
  - Other: .....
- .....

**11. Do you think the direct feedback provided by the RFM is an useful tool during delivery room resuscitation?**

- Yes
- No

Explanation:.....  
.....

**12. Do you think that the direct feedback (during resuscitation) and indirect feedback (auditing) provided by the RFM has influenced your decisions and/or actions during delivery room resuscitation even if you wouldn't use a RFM now?**

- Yes
- No
- Unsure

Explanation:.....  
.....

**13. Would you like to change anything about the RFM?**

- Yes
- No
- Unsure

If yes, what would you like to change about the RFM (e.g. position of the screen, content of the screen, design of the content of the screen)? Be as concrete as possible and provide suggestions/solutions if possible!

.....  
.....  
.....

**Other feedback regarding the RFM:**

.....  
.....  
.....  
.....
